# Supplementary material for: Long-term outcomes for Asian patients with X-linked hypophosphataemia: rationale and design of the SUNFLOWER longitudinal, observational cohort study
Source: PubMed Central journal article supplement — BMJ Open. 2020 Jun 29;10(6):e036367. doi: 10.1136/bmjopen-2019-036367 (PMC7328740; doi:10.1136/bmjopen-2019-036367), 2020-06-29
Supplement: bmjopen-2019-036367supp001.pdf [file bmjopen-2019-036367supp001.pdf]

**Supplementary Appendix 1.** Investigators and organizations involved in the SUNFLOWER study

**1. Lead Principal Investigator**

Keiichi Ozono (Osaka University, Osaka, Japan)

**2. Sub-Principal Investigator**

Seiji Fukumoto (Tokushima University, Tokushima, Japan)

**3. Steering Committee**

Hae Il Cheong (Seoul National Children's University, Seoul, Korea)

Toshimi Michigami (Osaka Women's and Children's Hospital, Osaka, Japan)

Noriyuki Namba (Osaka Hospital, Osaka, Japan)

Nobuaki Ito (The University of Tokyo, Tokyo, Japan)

**4. Medical Adviser for Study Management Office**

Takuo Kubota (Osaka University, Osaka, Japan)

**5. Central Review Committee**

Gen Nishimura (Musashino Yowakai Hospital, Tokyo, Japan)

Osamu Miyazaki (National Center for Child Health and Development, Tokyo, Japan)

Yutaka Tanami (Saitama Prefectural Children's Medical Center, Saitama, Japan)

Chikahisa Higuchi (Osaka Women's and Children's Hospital, Osaka, Japan)

Yuko Sakamoto (Juntendo University Nerima Hospital, Tokyo, Japan)

Seiji Fukumoto (Tokushima University, Tokushima, Japan)

Hae Il Cheong (Seoul National Children's University, Seoul, Korea)

Noriyuki Namba (Osaka Hospital, Osaka, Japan)

## **6. Epidemiologist**

Hisatomi Arima (Fukuoka University, Fukuoka, Japan)

## **7. Follow-Up Center**

Fukuoka University Hospital Clinical Research Assist Center (Fukuoka, Japan)

## **8. Statistician**

Ayumi Shintani (Osaka City University, Osaka, Japan)

## **9. International advisor**

Kunihiro Matsushita (Johns Hopkins Bloomberg School of Public Health, Maryland, USA)

## **10. Statistical analysis organizations**

- Osaka City University (Osaka, Japan)
- SRD Co., Ltd. (Tokyo, Japan)

## **11. Data Center**

SRD Co., Ltd. (Tokyo, Japan)

## 12. Study Medical Institutions

Takuo Kubota (Osaka University Hospital, Osaka, Japan), Toshimi Michigami (Osaka Women's and Children's Hospital, Osaka, Japan), Noriyuki Namba (Osaka Hospital, Osaka, Japan), Nobuaki Ito (The University of Tokyo Hospital, Tokyo, Japan), Yasuhiro Takeuchi (Toranomom Hospital, Tokyo, Japan), Yasuo Imanishi (Osaka City University, Osaka, Japan), Yoshihiro Maruo (Shiga University of Medical Science Hospital, Shiga, Japan), Takashi Hamajima (Aichi Children's Health and Medical Center, Aichi, Japan), Kayo Ozaki (Hyogo Prefectural Kobe Children's Hospital, Hyogo, Japan), Hiroyuki Tanaka (Okayama Saiseikai General Hospital, Okayama, Japan), Yukihiro Hasegawa (Tokyo Metropolitan Children's Medical Center, Tokyo, Japan), Itsuro Kazukawa (Chiba Children's Hospital, Chiba, Japan), Reiko Horikawa (National Center for Child Health and Development, Tokyo, Japan), Hiroshi Mochizuki (Saitama Prefectural Children's Medical Center, Saitama, Japan), Yuichi Mushimoto (Kyushu University Hospital, Fukuoka, Japan), Hae Il Cheong (Seoul National University Children's Hospital, Seoul, Korea), Yumie Rhee (Severance Hospital, Seoul, Korea) and Han-Wook Yoo (Asan Medical Center, Seoul, Korea)

## 13. Contracted audit organization

SRD Co., Ltd. (Tokyo, Japan)

## 14. Study Management Office

SRD Co., Ltd. (Tokyo, Japan)
